# Supplementary material
Source: publisher figshare collection journal article supplement (https://gsajournals.figshare.com/ndownloader/files/21191811)
Supplement: Supplementary file 1 [file 21191811]

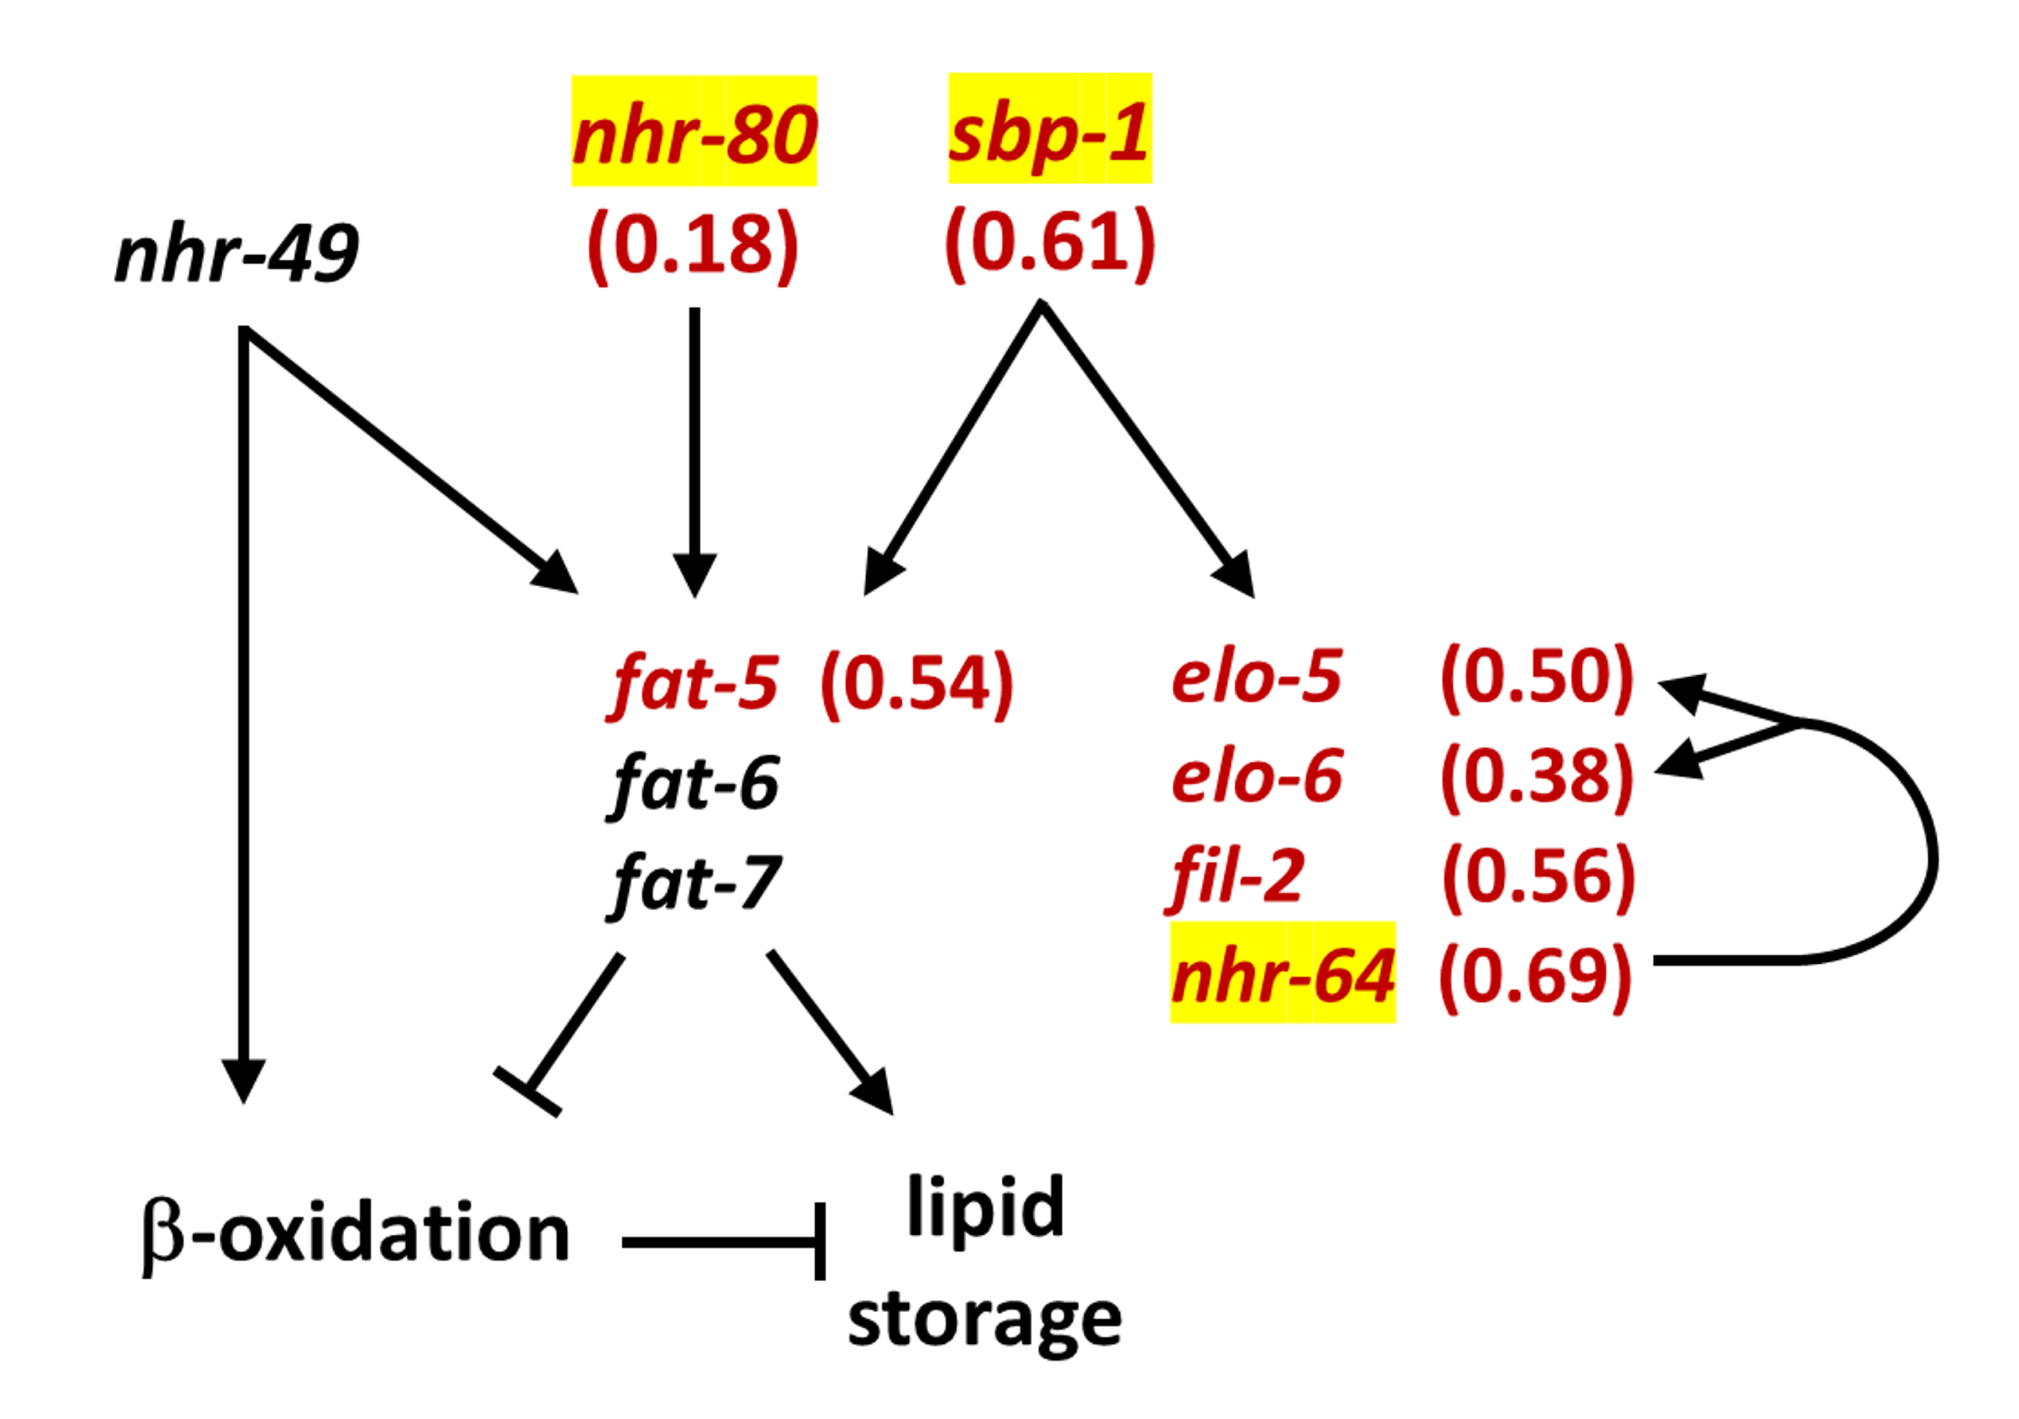


**Figure S4. LIN-29-regulated transcription factor genes involved in fatty acid metabolism.** In*hs::lin-29* animals, expression of transcription factor genes *nhr-80* and *sbp-1* is reduced, as well as the expression of *fat-5*, a known target of the two factors. In addition, other genes known to be regulated by SBP-1 show reduced expression after overexpression of *lin-29*: three genes involved in fatty acid metabolism (*elo-5, elo-6, fil-2*), and the transcription factor *nhr-64* (which also regulates *elo-5 and elo-6*).The number in parenthesis above the gene indicates the fold change in expression relative to *hs::control*. Figure adapted from (Zhu *et al.* 2018).
